# Supplementary material
Source: HighWire-hosted journal article supplement (https://jnis.bmj.com/content/15/3/283)
Supplement: inline-supplementary-material-2 [file inline-supplementary-material-2.pdf]

## SUPPLEMENTAL MATERIAL

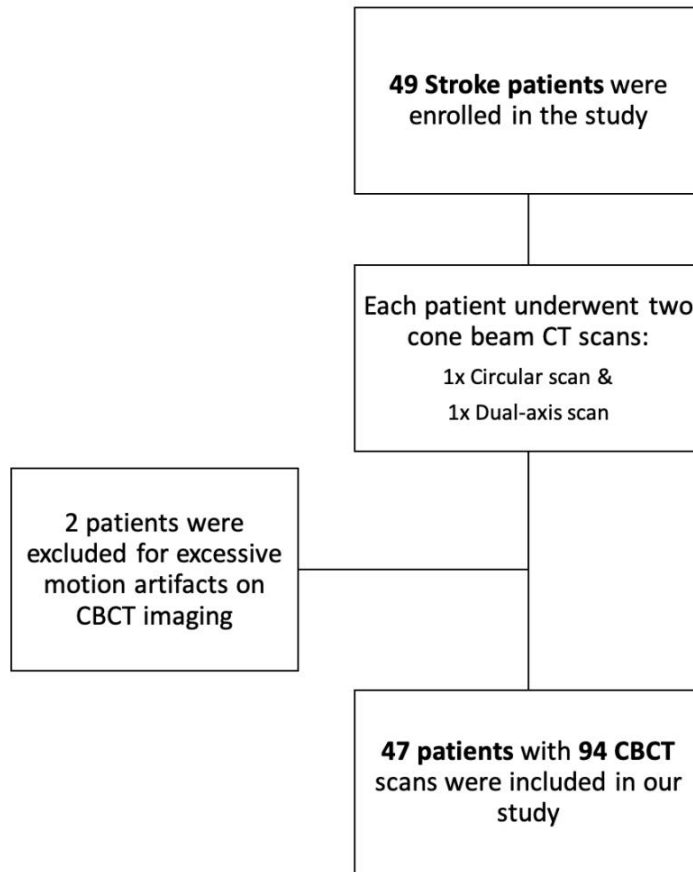

**Supplemental Figure 1. Patient flow diagram**

**Supplemental Video 1.** Butterfly trajectory demonstrated with incorporation of cranial and caudal angulation along the rotational cone beam CT imaging scan acquisition.
